# Supplementary material
Source: publisher site journal article supplement (https://edge.sagepub.com/system/files/appendix_a_z_table_0.docx)
Supplement: Supplementary file 1 [file appendix_a_z_table_0.docx]

# Appendix A

Unit Normal Table (*z* Table)

| ***z* score** | **Body** | ***Tail*** | ***z* score** | **Body** | ***Tail*** | ***z* score** | | **Body** | ***Tail*** | ***z* score** | **Body** | | ***Tail*** |
| --- | --- | --- | --- | --- | --- | --- | --- | --- | --- | --- | --- | --- | --- |
| **0.00** | 0.5000 | *0.5000* | **0.44** | 0.6700 | *0.3300* | **0.88** | | 0.8106 | *0.1894* | **1.32** | 0.9066 | | *0.0934* |
| **0.01** | 0.5040 | *0.4960* | **0.45** | 0.6736 | *0.3264* | **0.89** | | 0.8133 | *0.1867* | **1.33** | 0.9082 | | *0.0918* |
| **0.02** | 0.5080 | *0.4920* | **0.46** | 0.6772 | *0.3228* | **0.90** | | 0.8159 | *0.1841* | **1.34** | 0.9099 | | *0.0901* |
| **0.03** | 0.5120 | *0.4880* | **0.47** | 0.6808 | *0.3192* | **0.91** | | 0.8186 | *0.1814* | **1.35** | 0.9115 | | *0.0885* |
| **0.04** | 0.5160 | *0.4840* | **0.48** | 0.6844 | *0.3156* | **0.92** | | 0.8212 | *0.1788* | **1.36** | 0.9131 | | *0.0869* |
| **0.05** | 0.5199 | *0.4801* | **0.49** | 0.6879 | *0.3121* | **0.93** | | 0.8238 | *0.1762* | **1.37** | 0.9147 | | *0.0853* |
| **0.06** | 0.5239 | *0.4761* | **0.50** | 0.6915 | *0.3085* | **0.94** | | 0.8264 | *0.1736* | **1.38** | 0.9162 | | *0.0838* |
| **0.07** | 0.5279 | *0.4721* | **0.51** | 0.6950 | *0.3050* | **0.95** | | 0.8289 | *0.1711* | **1.39** | 0.9177 | | *0.0823* |
| **0.08** | 0.5319 | *0.4681* | **0.52** | 0.6985 | *0.3015* | **0.96** | | 0.8315 | *0.1685* | **1.40** | 0.9192 | | *0.0808* |
| **0.09** | 0.5359 | *0.4641* | **0.53** | 0.7019 | *0.2981* | **0.97** | | 0.8340 | *0.1660* | **1.41** | 0.9207 | | *0.0793* |
| **0.10** | 0.5398 | *0.4602* | **0.54** | 0.7054 | *0.2946* | **0.98** | | 0.8365 | *0.1635* | **1.42** | 0.9222 | | *0.0778* |
| **0.11** | 0.5438 | *0.4562* | **0.55** | 0.7088 | *0.2912* | **0.99** | | 0.8389 | *0.1611* | **1.43** | 0.9236 | | *0.0764* |
| **0.12** | 0.5478 | *0.4522* | **0.56** | 0.7123 | *0.2877* | **1.00** | | 0.8413 | *0.1587* | **1.44** | 0.9251 | | *0.0749* |
| **0.13** | 0.5517 | *0.4483* | **0.57** | 0.7157 | *0.2843* | **1.01** | | 0.8438 | *0.1562* | **1.45** | 0.9265 | | *0.0735* |
| **0.14** | 0.5557 | *0.4443* | **0.58** | 0.7190 | *0.2810* | **1.02** | | 0.8461 | *0.1539* | **1.46** | 0.9279 | | *0.0721* |
| **0.15** | 0.5596 | *0.4404* | **0.59** | 0.7224 | *0.2776* | **1.03** | | 0.8485 | *0.1515* | **1.47** | 0.9292 | | *0.0708* |
| **0.16** | 0.5636 | *0.4364* | **0.60** | 0.7257 | *0.2743* | **1.04** | | 0.8508 | *0.1492* | **1.48** | 0.9306 | | *0.0694* |
| **0.17** | 0.5675 | *0.4325* | **0.61** | 0.7291 | *0.2709* | **1.05** | | 0.8531 | *0.1469* | **1.49** | 0.9319 | | *0.0681* |
| **0.18** | 0.5714 | *0.4286* | **0.62** | 0.7324 | *0.2676* | **1.06** | | 0.8554 | *0.1446* | **1.50** | 0.9332 | | *0.0668* |
| **0.19** | 0.5753 | *0.4247* | **0.63** | 0.7357 | *0.2643* | **1.07** | | 0.8577 | *0.1423* | **1.51** | 0.9345 | | *0.0655* |
| **0.20** | 0.5793 | *0.4207* | **0.64** | 0.7389 | *0.2611* | **1.08** | | 0.8599 | *0.1401* | **1.52** | 0.9357 | | *0.0643* |
| **0.21** | 0.5832 | *0.4168* | **0.65** | 0.7422 | *0.2578* | **1.09** | | 0.8621 | *0.1379* | **1.53** | 0.9370 | | *0.0630* |
| **0.22** | 0.5871 | *0.4129* | **0.66** | 0.7454 | *0.2546* | **1.10** | | 0.8643 | *0.1357* | **1.54** | 0.9382 | | *0.0618* |
| **0.23** | 0.5910 | *0.4090* | **0.67** | 0.7486 | *0.2514* | **1.11** | | 0.8665 | *0.1335* | **1.55** | 0.9394 | | *0.0606* |
| **0.24** | 0.5948 | *0.4052* | **0.68** | 0.7517 | *0.2483* | **1.12** | | 0.8686 | *0.1314* | **1.56** | 0.9406 | | *0.0594* |
| **0.25** | 0.5987 | *0.4013* | **0.69** | 0.7549 | *0.2451* | **1.13** | | 0.8708 | *0.1292* | **1.57** | 0.9418 | | *0.0582* |
| **0.26** | 0.6026 | *0.3974* | **0.70** | 0.7580 | *0.2420* | **1.14** | | 0.8729 | *0.1271* | **1.58** | 0.9429 | | *0.0571* |
| **0.27** | 0.6064 | *0.3936* | **0.71** | 0.7611 | *0.2389* | **1.15** | | 0.8749 | *0.1251* | **1.59** | 0.9441 | | *0.0559* |
| **0.28** | 0.6103 | *0.3897* | **0.72** | 0.7642 | *0.2358* | **1.16** | | 0.8770 | *0.1230* | **1.60** | 0.9452 | | *0.0548* |
| **0.29** | 0.6141 | *0.3859* | **0.73** | 0.7673 | *0.2327* | **1.17** | | 0.8790 | *0.1210* | **1.61** | 0.9463 | | *0.0537* |
| **0.30** | 0.6179 | *0.3821* | **0.74** | 0.7704 | *0.2296* | **1.18** | | 0.8810 | *0.1190* | **1.62** | 0.9474 | | *0.0526* |
| **0.31** | 0.6217 | *0.3783* | **0.75** | 0.7734 | *0.2266* | **1.19** | | 0.8830 | *0.1170* | **1.63** | 0.9484 | | *0.0516* |
| **0.32** | 0.6255 | *0.3745* | **0.76** | 0.7764 | *0.2236* | **1.20** | | 0.8849 | *0.1151* | **1.64** | 0.9495 | | *0.0505* |
| **0.33** | 0.6293 | *0.3707* | **0.77** | 0.7794 | *0.2206* | **1.21** | | 0.8869 | *0.1131* | **1.65** | 0.9505 | | *0.0495* |
| **0.34** | 0.6331 | *0.3669* | **0.78** | 0.7823 | *0.2177* | **1.22** | | 0.8888 | *0.1112* | **1.66** | 0.9515 | | *0.0485* |
| **0.35** | 0.6368 | *0.3632* | **0.79** | 0.7852 | *0.2148* | **1.23** | | 0.8907 | *0.1093* | **1.67** | 0.9525 | | *0.0475* |
| **0.36** | 0.6406 | *0.3594* | **0.80** | 0.7881 | *0.2119* | **1.24** | | 0.8925 | *0.1075* | **1.68** | 0.9535 | | *0.0465* |
| **0.37** | 0.6443 | *0.3557* | **0.81** | 0.7910 | *0.2090* | **1.25** | | 0.8944 | *0.1056* | **1.69** | 0.9545 | | *0.0455* |
| **0.38** | 0.6480 | *0.3520* | **0.82** | 0.7939 | *0.2061* | **1.26** | | 0.8962 | *0.1038* | **1.70** | 0.9554 | | *0.0446* |
| **0.39** | 0.6517 | *0.3483* | **0.83** | 0.7967 | *0.2033* | **1.27** | | 0.8980 | *0.1020* | **1.71** | 0.9564 | | *0.0436* |
| **0.40** | 0.6554 | *0.3446* | **0.84** | 0.7995 | *0.2005* | **1.28** | | 0.8997 | *0.1003* | **1.72** | 0.9573 | | *0.0427* |
| **0.41** | 0.6591 | *0.3409* | **0.85** | 0.8023 | *0.1977* | **1.29** | | 0.9015 | *0.0985* | **1.73** | 0.9582 | | *0.0418* |
| **0.42** | 0.6628 | *0.3372* | **0.86** | 0.8051 | *0.1949* | **1.30** | | 0.9032 | *0.0968* | **1.74** | 0.9591 | | *0.0409* |
| **0.43** | 0.6664 | *0.3336* | **0.87** | 0.8078 | *0.1922* | **1.31** | | 0.9049 | *0.0951* | **1.75** | 0.9599 | | *0.0401* |
|  |  |  |  |  |  |  | |  |  |  |  | |  |
| ***z* score** | **Body** | ***Tail*** | ***z* score** | **Body** | ***Tail*** | ***z score*** | **Body** | | ***Tail*** | ***z score*** | **Body** | ***Tail*** | |
| **1.76** | 0.9608 | *0.0392* | **2.20** | 0.9861 | *0.0139* | ***2.64*** | 0.9959 | | *0.0041* | ***3.08*** | 0.9990 | *0.0010* | |
| **1.77** | 0.9616 | *0.0384* | **2.21** | 0.9864 | *0.0136* | ***2.65*** | 0.9960 | | *0.0040* | ***3.09*** | 0.9990 | *0.0010* | |
| **1.78** | 0.9625 | *0.0375* | **2.22** | 0.9868 | *0.0132* | ***2.66*** | 0.9961 | | *0.0039* | ***3.10*** | 0.9990 | *0.0010* | |
| **1.79** | 0.9633 | *0.0367* | **2.23** | 0.9871 | *0.0129* | ***2.67*** | 0.9962 | | *0.0038* | ***3.11*** | 0.9991 | *0.0009* | |
| **1.80** | 0.9641 | *0.0359* | **2.24** | 0.9875 | *0.0125* | ***2.68*** | 0.9963 | | *0.0037* | ***3.12*** | 0.9991 | *0.0009* | |
| **1.81** | 0.9649 | *0.0351* | **2.25** | 0.9878 | *0.0122* | ***2.69*** | 0.9964 | | *0.0036* | ***3.13*** | 0.9991 | *0.0009* | |
| **1.82** | 0.9656 | *0.0344* | **2.26** | 0.9881 | *0.0119* | ***2.70*** | 0.9965 | | *0.0035* | ***3.14*** | 0.9992 | *0.0008* | |
| **1.83** | 0.9664 | *0.0336* | **2.27** | 0.9884 | *0.0116* | ***2.71*** | 0.9966 | | *0.0034* | ***3.15*** | 0.9992 | *0.0008* | |
| **1.84** | 0.9671 | *0.0329* | **2.28** | 0.9887 | *0.0113* | ***2.72*** | 0.9967 | | *0.0033* | ***3.16*** | 0.9992 | *0.0008* | |
| **1.85** | 0.9678 | *0.0322* | **2.29** | 0.9890 | *0.0110* | ***2.73*** | 0.9968 | | *0.0032* | ***3.17*** | 0.9992 | *0.0008* | |
| **1.86** | 0.9686 | *0.0314* | **2.30** | 0.9893 | *0.0107* | ***2.74*** | 0.9969 | | *0.0031* | ***3.18*** | 0.9993 | *0.0007* | |
| **1.87** | 0.9693 | *0.0307* | **2.31** | 0.9896 | *0.0104* | ***2.75*** | 0.9970 | | *0.0030* | ***3.19*** | 0.9993 | *0.0007* | |
| **1.88** | 0.9699 | *0.0301* | **2.32** | 0.9898 | *0.0102* | ***2.76*** | 0.9971 | | *0.0029* | ***3.20*** | 0.9993 | *0.0007* | |
| **1.89** | 0.9706 | *0.0294* | **2.33** | 0.9901 | *0.0099* | ***2.77*** | 0.9972 | | *0.0028* | ***3.21*** | 0.9993 | *0.0007* | |
| **1.90** | 0.9713 | *0.0287* | **2.34** | 0.9904 | *0.0096* | ***2.78*** | 0.9973 | | *0.0027* | ***3.22*** | 0.9994 | *0.0006* | |
| **1.91** | 0.9719 | *0.0281* | **2.35** | 0.9906 | *0.0094* | ***2.79*** | 0.9974 | | *0.0026* | ***3.23*** | 0.9994 | *0.0006* | |
| **1.92** | 0.9726 | *0.0274* | **2.36** | 0.9909 | *0.0091* | ***2.80*** | 0.9974 | | *0.0026* | ***3.24*** | 0.9994 | *0.0006* | |
| **1.93** | 0.9732 | *0.0268* | **2.37** | 0.9911 | *0.0089* | ***2.81*** | 0.9975 | | *0.0025* | ***3.25*** | 0.9994 | *0.0006* | |
| **1.94** | 0.9738 | *0.0262* | **2.38** | 0.9913 | *0.0087* | ***2.82*** | 0.9976 | | *0.0024* | ***3.26*** | 0.9994 | *0.0006* | |
| **1.95** | 0.9744 | *0.0256* | **2.39** | 0.9916 | *0.0084* | ***2.83*** | 0.9977 | | *0.0023* | ***3.27*** | 0.9995 | *0.0005* | |
| **1.96** | 0.9750 | *0.0250* | **2.40** | 0.9918 | *0.0082* | ***2.84*** | 0.9977 | | *0.0023* | ***3.28*** | 0.9995 | *0.0005* | |
| **1.97** | 0.9756 | *0.0244* | **2.41** | 0.9920 | *0.0080* | ***2.85*** | 0.9978 | | *0.0022* | ***3.29*** | 0.9995 | *0.0005* | |
| **1.98** | 0.9761 | *0.0239* | **2.42** | 0.9922 | *0.0078* | ***2.86*** | 0.9979 | | *0.0021* | ***3.30*** | 0.9995 | *0.0005* | |
| **1.99** | 0.9767 | *0.0233* | **2.43** | 0.9925 | *0.0075* | ***2.87*** | 0.9979 | | *0.0021* | ***3.31*** | 0.9995 | *0.0005* | |
| **2.00** | 0.9772 | *0.0228* | **2.44** | 0.9927 | *0.0073* | ***2.88*** | 0.9980 | | *0.0020* | ***3.32*** | 0.9995 | *0.0005* | |
| **2.01** | 0.9778 | *0.0222* | **2.45** | 0.9929 | *0.0071* | ***2.89*** | 0.9981 | | *0.0019* | ***3.33*** | 0.9996 | *0.0004* | |
| **2.02** | 0.9783 | *0.0217* | **2.46** | 0.9931 | *0.0069* | ***2.90*** | 0.9981 | | *0.0019* | ***3.34*** | 0.9996 | *0.0004* | |
| **2.03** | 0.9788 | *0.0212* | **2.47** | 0.9932 | *0.0068* | ***2.91*** | 0.9982 | | *0.0018* | ***3.35*** | 0.9996 | *0.0004* | |
| **2.04** | 0.9793 | *0.0207* | **2.48** | 0.9934 | *0.0066* | ***2.92*** | 0.9982 | | *0.0018* | ***3.36*** | 0.9996 | *0.0004* | |
| **2.05** | 0.9798 | *0.0202* | **2.49** | 0.9936 | *0.0064* | ***2.93*** | 0.9983 | | *0.0017* | ***3.37*** | 0.9996 | *0.0004* | |
| **2.06** | 0.9803 | *0.0197* | **2.50** | 0.9938 | *0.0062* | ***2.94*** | 0.9984 | | *0.0016* | ***3.38*** | 0.9996 | *0.0004* | |
| **2.07** | 0.9808 | *0.0192* | **2.51** | 0.9940 | *0.0060* | ***2.95*** | 0.9984 | | *0.0016* | ***3.39*** | 0.9997 | *0.0003* | |
| **2.08** | 0.9812 | *0.0188* | **2.52** | 0.9941 | *0.0059* | ***2.96*** | 0.9985 | | *0.0015* | ***3.40*** | 0.9997 | *0.0003* | |
| **2.09** | 0.9817 | *0.0183* | **2.53** | 0.9943 | *0.0057* | ***2.97*** | 0.9985 | | *0.0015* | ***3.41*** | 0.9997 | *0.0003* | |
| **2.10** | 0.9821 | *0.0179* | **2.54** | 0.9945 | *0.0055* | ***2.98*** | 0.9986 | | *0.0014* | ***3.42*** | 0.9997 | *0.0003* | |
| **2.11** | 0.9826 | *0.0174* | **2.55** | 0.9946 | *0.0054* | ***2.99*** | 0.9986 | | *0.0014* | ***3.43*** | 0.9997 | *0.0003* | |
| **2.12** | 0.9830 | *0.0170* | **2.56** | 0.9948 | *0.0052* | ***3.00*** | 0.9987 | | *0.0013* | ***3.44*** | 0.9997 | *0.0003* | |
| **2.13** | 0.9834 | *0.0166* | **2.57** | 0.9949 | *0.0051* | ***3.01*** | 0.9987 | | *0.0013* | ***3.45*** | 0.9997 | *0.0003* | |
| **2.14** | 0.9838 | *0.0162* | **2.58** | 0.9951 | *0.0049* | ***3.02*** | 0.9987 | | *0.0013* | ***3.46*** | 0.9997 | *0.0003* | |
| **2.15** | 0.9842 | *0.0158* | **2.59** | 0.9952 | *0.0048* | ***3.03*** | 0.9988 | | *0.0012* | ***3.47*** | 0.9997 | *0.0003* | |
| **2.16** | 0.9846 | *0.0154* | **2.60** | 0.9953 | *0.0047* | ***3.04*** | 0.9988 | | *0.0012* | ***3.48*** | 0.9997 | *0.0003* | |
| **2.17** | 0.9850 | *0.0150* | **2.61** | 0.9955 | *0.0045* | ***3.05*** | 0.9989 | | *0.0011* | ***3.49*** | 0.9998 | *0.0002* | |
| **2.18** | 0.9854 | *0.0146* | **2.62** | 0.9956 | *0.0044* | ***3.06*** | 0.9989 | | *0.0011* | ***3.50*** | 0.9998 | *0.0002* | |
| **2.19** | 0.9857 | *0.0143* | **2.63** | 0.9957 | *0.0043* | ***3.07*** | 0.9989 | | *0.0011* | ***3.51*** | 0.9998 | *0.0002* | |

# 
